# Supplementary material for: A facile route to synthesize endurable mesopore containing ZSM-5 catalyst for methanol to propylene reaction
Source: Royal Society of Chemistry journal article supplement (doi:10.1039/b925850g), 2010-01-01
Supplement: b925850g.pdf [file b925850g.pdf]

## Electronic Supplementary Information (ESI)

# A facile route to synthesize enduring mesopore containing ZSM-5 catalyst for methanol to propylene reaction

Chao Sun, Junming Du, Jian Liu, Yisu Yang, Nan Ren, Wei Shen, Hualong Xu\* and Yi Tang\*

## Preparation of mesopore containing zeolite ZSM-5 (*c.f.*, mesoZSM-5, scheme 1)

Typically, 4 g of as-synthesized SBA-15 (with P123 surfactant inside) was directly calcined at 1173 K for 6 h at a heating rate of 1 K min<sup>-1</sup> under Ar. After carbonization process, the SBA-15/carbon composite was immersed into an aqueous solution containing 4.0 g of NaOH and 20 g of deionized water in a flask and refluxed at 368 K for 12 h, followed by addition of certain amount of sulfuric acid, NaAlO<sub>2</sub>, TPABr, water and of Na<sub>2</sub>SiO<sub>3</sub> according to desired mesoporosity and Si/Al ratio in the resulting mesoZSM-5 materials. The obtained mixture with a molar composition of 1SiO<sub>2</sub>:0.003125Al<sub>2</sub>O<sub>3</sub>:0.09375TPABr:30H<sub>2</sub>O was stirred for 12 h and then was transferred to a Teflon-lined autoclave for crystallization at 453 K for 48 h. The product was washed with deionized water and dried at 353 K overnight. Finally the as-synthesized carbon/ZSM-5 composite was calcined in air at 823 K for 6 h to remove the carbon material and organic template. The obtained carbon-free ZSM-5 sample was donated as mesoZSM-5(x), where x=A or B corresponding to different carbon/silica molar ratio during the crystallization process of ZSM-5 zeolite. For comparison, ZSM-5 sample without any addition of carbon template was also synthesized (donated as ZSM-5).

**Table S1** Textural properties of as-synthesized SBA-15 calcined under air and Ar

| Sample      | BET surface area(m <sup>2</sup> /g) | Micropore volume(cm <sup>3</sup> /g) | Total pore volume(cm <sup>3</sup> /g) |
|-------------|-------------------------------------|--------------------------------------|---------------------------------------|
| SBA-15(Air) | 780                                 | 0.04                                 | 1.30                                  |
| SBA-15 (Ar) | 416                                 | 0.00                                 | 0.72                                  |

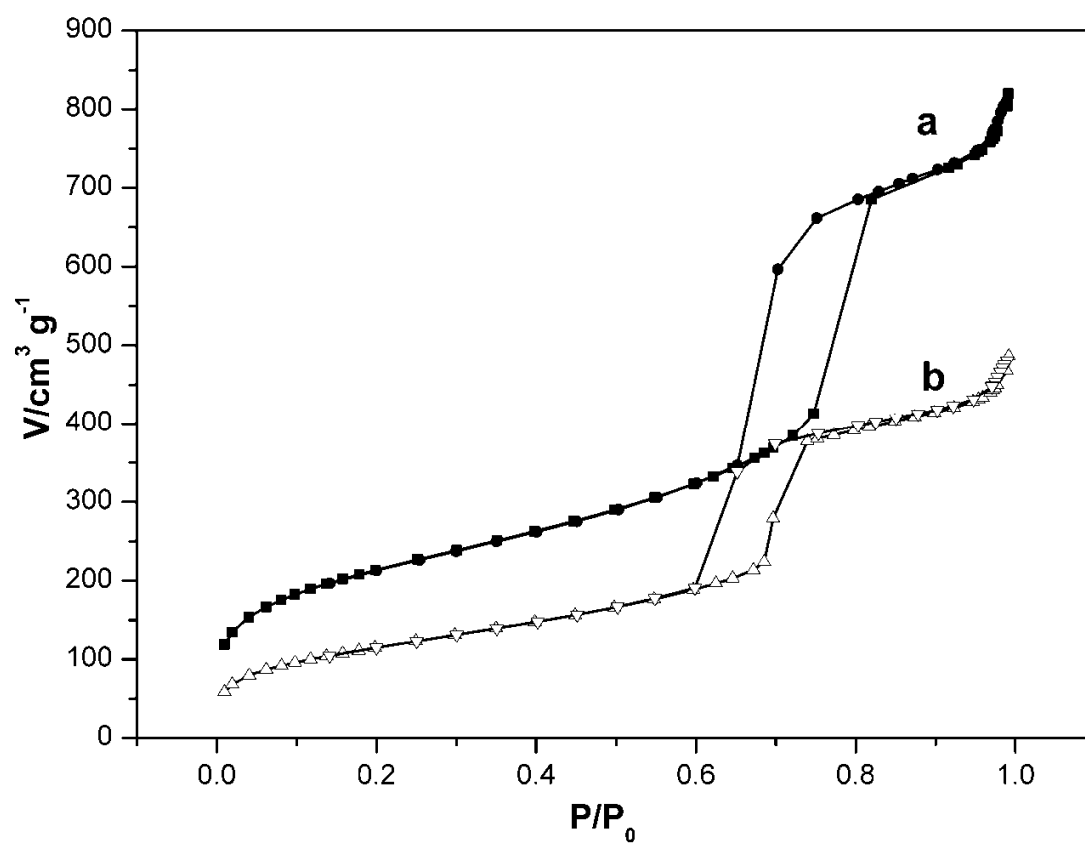

**Fig. S1**  $\text{N}_2$  sorption isotherms of as-synthesized SBA-15 calcined under air (a) and Ar (b)

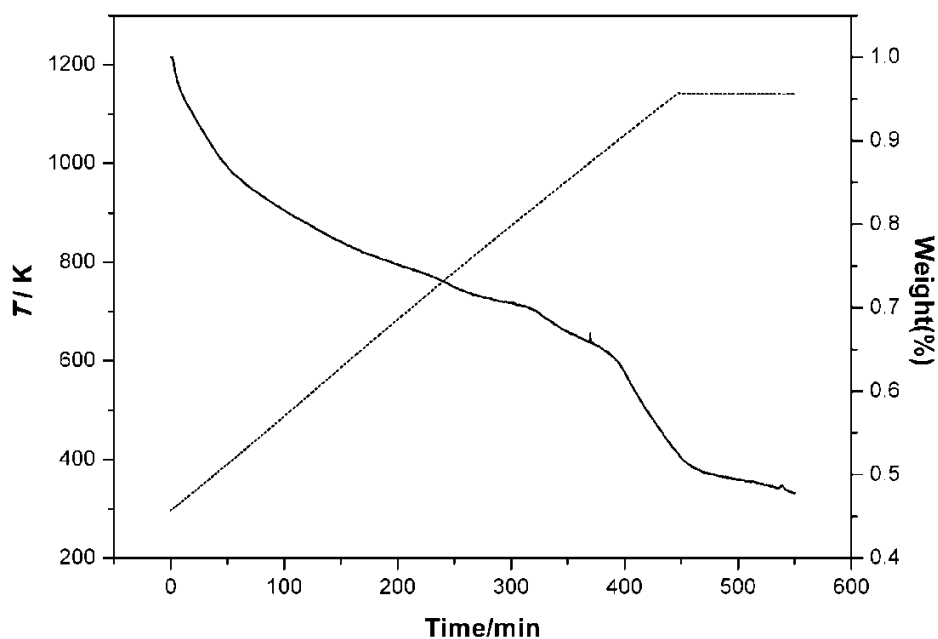

**Fig. S2** Thermogravimetric analysis (TGA) analysis of carbonized SBA-15 under air, with a ramping temperature rate of  $2 \text{ K min}^{-1}$

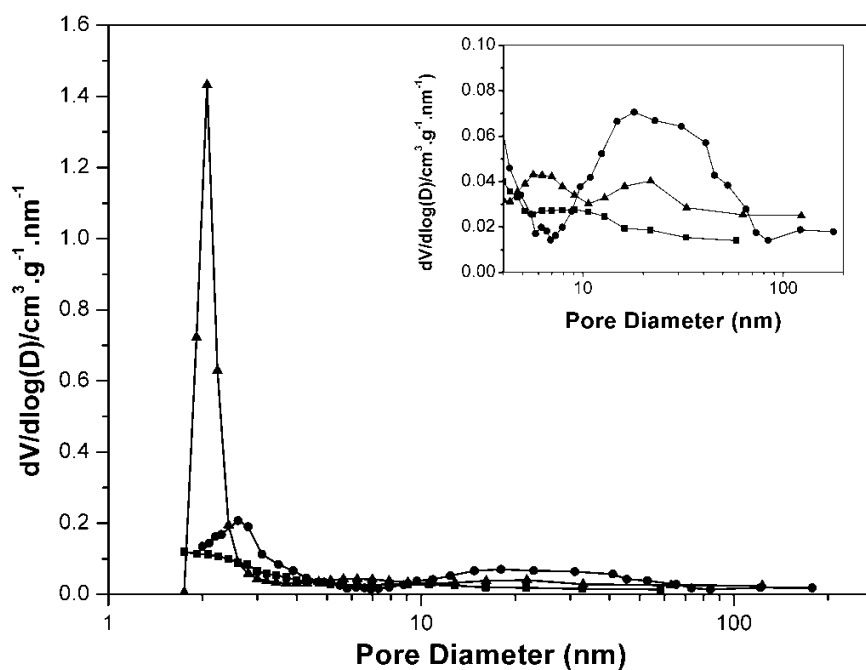

**Fig. S3** Pore size distribution of ZSM-5(■), mesoZSM-5A(●), mesoZSM-5B(▲)

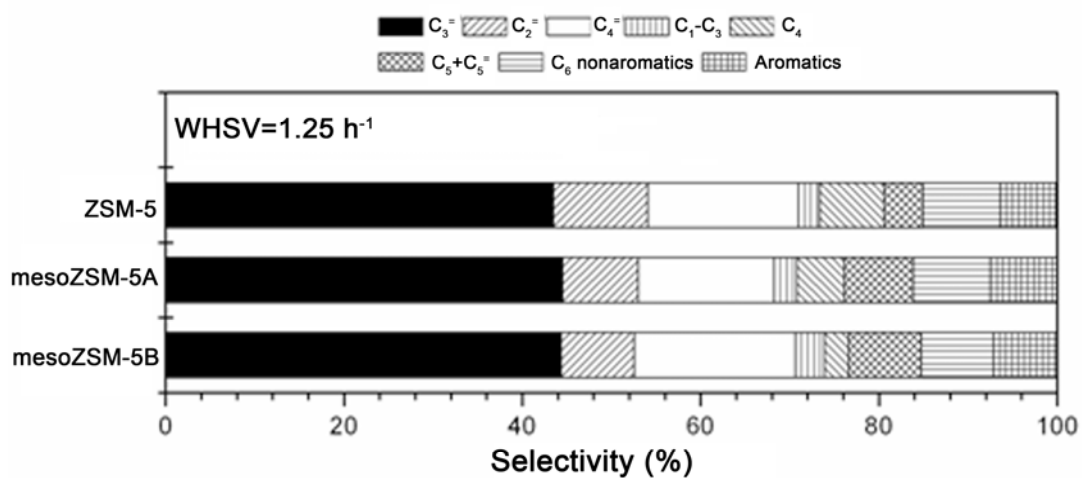

**Fig. S4** Initial product selectivity of MTP reaction over ZSM-5, mesoZSM-5A and mesoZSM-5B, reaction conditions: WHSV=1.25 h<sup>-1</sup>, T=733 K, n(CH<sub>3</sub>OH):n(H<sub>2</sub>O)=1:5, P<sub>total</sub>=1 atm
